# Supplementary material for: Catalysis in supercritical CO2 using dendrimer-encapsulated palladium nanoparticles.
Source: Royal Society of Chemistry journal article supplement (doi:10.1039/b106594g), 2001-10-24
Supplement: b106594g.doc [file b106594g.doc]

##### Supporting Information

**Catalysis in Supercritical CO2 using Dendrimer-Encapsulated Palladium Nanoparticles**

Lee K. Yeung, C. Ted Lee Jr., Keith P. Johnston, and Richard M. Crooks

**DEC Synthesis**

All manipulations were performed under ambient laboratory conditions. 45.0 mg (0.0005 mmol) of 90% perfluor-2,5,8,11-tetramethyl-3,6,9,12-tetraoxapentadecanoyl perfluoropolyether derivatized PPI-64 dendrimer was dissolved in 5 mL of C2F3Cl3 (CFC-113). 5.0 mg (0.015 mmol) of K2PdCl4 was then dissolved in 5 ml of a 50% ethanol:water solution and added to the fluorocarbon phase with rapid stirring forming an emulsion. Brief sonication induced phase separation. The aqueous-ethanol phase was removed and the CFC-113 solution was repeatedly washed with deionized water. The washings were clear and UV-vis spectroscopy revealed no Pd(II) ions, indicating complete incorporation of the metal ions into the nanoreactor. A solution containing 6.0 mg (0.160 mmol) of NaBH4 in 1 mL of water was added to a stirred solution of the PPPI-64/Pd(II) complex. The golden yellow solution immediately turned dark brown. After 10 min, an equal volume of water was added. The dark-colored fluorous phase was removed and washed with an ethanol:water solution (1:5) followed by an equal volume of pure water. This wash cycle was repeated at least 3 times. Following evaporation of the fluorocarbon solvent, the nanocomposite could be isolated as a tacky residue. DECs were also prepared from Pd(OAc)2, using a 50% acetonitrile:water solution instead of the 50% ethanol:water solution used for the DECs derived from K2PdCl4. The DECs were characterized by TEM and UV-vis spectroscopy to insure size uniformity and chemical purity, respectively.

**Hydrogenation reactions**

The appropriate amount of DEC CFC-113 solution (1-2.6 mol% Pd) was pipetted into a variable-volume, stainless steel reactor equipped with a magnetic stir-bar and the solvent was evaporated with a stream of dry nitrogen, leaving a dark-colored residue. n-Decane was added as an internal standard. The reactor was charged with approximately 12.5 mL of CO2 followed by the desired amount of dry H2 gas, careful not to exceed the miscibility level and pressurized to 5000 psi. The styrene substrate was then added via a six-way injection valve. The progress of the reaction was followed by slowly venting 0.01 mL aliquots of the reaction mixture into 1 mL of EtOH. The solution was then subjected to capillary gas chromatography (GC) to monitor the appearance of the product. After the reaction, the reaction vessel was depressurized to the vapor pressure of CO2. The CO2 vapor phase was slowly vented and the interior of the chamber was washed with 1,1,2-trichlorotrifluoroethane (CFC-113). A small amount of methanol-*d*4 was added to this sample and analyzed by 1H NMR.

**Heck reactions**

The appropriate amount of DEC CFC-113 solution (1-2.6 mol% Pd) was pipetted into a variable-volume, stainless steel reactor equipped with a magnetic stir-bar and the solvent was evaporated with a stream of dry nitrogen, leaving a dark-colored residue. The reactor was then charged with methylacrylate (MA), triethylamine (TEA), and *n*-decane (0.03 : 1 : 1: 0.5 molar ratio). The chamber was filled with approximately 12.5 mL of CO2, pressurized to 5000 psi, and then the entire apparatus was allowed to equilibrate to 75 C in a circulating water bath. Iodobenzene (PhI) was then added via a six-way injection valve to initiate the reaction. The final reaction mixture molar ratio of Pd metal, *n*-decane, PhI, TEA, and MA was 0.03 : 0.5 : 0.5 : 1 : 1. The progress of the reaction was followed by slowly venting 0.01 mL aliquots of the reaction mixture into 1 mL of EtOH. The solution was then subjected to capillary gas chromatography (GC) to monitor the disappearance of PhI (the limiting reagent). After the reaction, the entire apparatus was allowed to cool to room temperature and then depressurized to the vapor pressure of CO2. The CO2 vapor phase was slowly vented and the interior of the chamber was washed with 1,1,2-trichlorotrifluoroethane (CFC-113). A small amount of acetone-*d*6 was added and the sample was analyzed by 1H NMR.
